# Supplementary material for: Three-Factor Structure of the eHealth Literacy Scale Among Magnetic Resonance Imaging and Computed Tomography Outpatients: A Confirmatory Factor Analysis
Source: PubMed Central journal article supplement (PMC5838360; doi:10.2196/humanfactors.9039), 2018-02-19
Supplement: humanfactors_v5i1e6_app1.pdf [file humanfactors_v5i1e6_app1.pdf]

## Multimedia Appendix 1

Multimedia Appendix Table 1: Participant responses to eHEALS items (n = 261)

| Factor<br>Variable                                                               | Strongly<br>disagree | Disagree  | Undecided | Agree      | Strongly<br>agree |
|----------------------------------------------------------------------------------|----------------------|-----------|-----------|------------|-------------------|
| n (%) <sup>a</sup>                                                               |                      |           |           |            |                   |
| <b>Awareness</b>                                                                 |                      |           |           |            |                   |
| I know what health resources are available on the internet                       | 12 (4.6)             | 50 (19.2) | 55 (21.1) | 115 (44.1) | 29 (11.1)         |
| I know where to find helpful health resources on the internet                    | 10 (3.8)             | 50 (19.2) | 47 (18.0) | 121 (46.4) | 33 (12.6)         |
| <b>Skills</b>                                                                    |                      |           |           |            |                   |
| I know how to find helpful health resources on the internet                      | 9 (3.5)              | 41 (15.7) | 37 (14.2) | 135 (51.9) | 38 (14.6)         |
| I know how to use the internet to answer my questions about health               | 12 (4.7)             | 28 (10.9) | 36 (14.0) | 132 (51.2) | 50 (19.4)         |
| I know how to use the information I find on the internet to help me              | 10 (3.9)             | 34 (13.2) | 48 (18.6) | 126 (49.8) | 40 (15.5)         |
| <b>Evaluate</b>                                                                  |                      |           |           |            |                   |
| I have the skill I need to evaluate the health resources I find on the internet  | 14 (5.4)             | 48 (18.7) | 53 (20.6) | 93 (36.2)  | 49 (19.1)         |
| I can tell high quality from low quality health resources on the internet        | 11 (4.3)             | 59 (23.0) | 63 (24.6) | 79 (30.9)  | 44 (17.2)         |
| I feel confident in using information from the internet to make health decisions | 21 (8.2)             | 52 (20.3) | 72 (28.1) | 81 (31.6)  | 30 (11.7)         |

<sup>a</sup> Number of observations for each eHEALS item may not total 261 due to missing data
