# Supplementary material for: Three-Factor Structure of the eHealth Literacy Scale Among Magnetic Resonance Imaging and Computed Tomography Outpatients: A Confirmatory Factor Analysis
Source: PubMed Central journal article supplement (PMC5838360; doi:10.2196/humanfactors.9039), 2018-02-19
Supplement: humanfactors_v5i1e6_app2.pdf [file humanfactors_v5i1e6_app2.pdf]

## Multimedia Appendix 2

Multimedia Appendix Table 2: Factor loading and residual error estimates for the confirmatory factor analysis of the 7-item model

| Factor<br>Variable                                                               | Factor loadings (95%<br>CI)      | Error estimates (95%<br>CI)   | IR <sup>a</sup> | CR <sup>b</sup> | VEE <sup>c</sup> |
|----------------------------------------------------------------------------------|----------------------------------|-------------------------------|-----------------|-----------------|------------------|
| <b>Awareness</b>                                                                 |                                  |                               |                 |                 |                  |
| I know what health resources are available on the internet                       | 0.85 (0.80 to 0.89) <sup>e</sup> | .28 (.20 to .36) <sup>e</sup> | .72             | .89             | .80              |
| I know where to find helpful health resources on the internet                    | 0.94 (0.90 to 0.98) <sup>e</sup> | .12 (.05 to .19) <sup>f</sup> | .89             |                 |                  |
| <b>Skills</b>                                                                    |                                  |                               |                 |                 |                  |
| I know how to use the internet to answer my questions about health               | 0.90 (0.86 to 0.93) <sup>e</sup> | .20 (.14 to .25) <sup>e</sup> | .80             | .90             | .82              |
| I know how to use the information I find on the internet to help me              | 0.92 (0.89 to 0.94) <sup>e</sup> | .16 (.11 to .22) <sup>e</sup> | .84             |                 |                  |
| <b>Evaluate</b>                                                                  |                                  |                               |                 |                 |                  |
| I have the skills I need to evaluate the health resources I find on the internet | 0.89 (0.86 to 0.93) <sup>e</sup> | .21 (.14 to .27) <sup>e</sup> | .79             | .89             | .72              |
| I can tell high quality from low quality health resources on the internet        | 0.86 (0.82 to 0.90) <sup>e</sup> | .26 (.19 to .33) <sup>e</sup> | .74             |                 |                  |
| I feel confident in using information from the internet to make health decisions | 0.80 (0.75 to 0.85) <sup>e</sup> | .36 (.28 to .44) <sup>e</sup> | .64             |                 |                  |

<sup>a</sup> IR: Indicator Reliability

<sup>b</sup> CR: Composite Reliability

<sup>c</sup> VEE: Variance Extracted Estimate

<sup>e</sup>  $P < .001$

<sup>f</sup>  $P = .001$
